# Supplementary material for: A survey of search-based refactoring for software maintenance
Source: Springer Nature journal article supplement (doi:10.1186/s40411-018-0046-4), 2018-02-07
Supplement: MOESM1 [file 15445104]

## Sheet: Graphs
Search Technique	Number Of Studies
EA	26
GA	24
GP	3
GEA	2
SOA	5
PSO	3
ABC	1
ACO	0
HC	14
SA	11
CRO	1
VNS	1
Number Of Search Techniques Used	Number Of Studies
None	11
One	24
Two	10
Three	4
Four	1
Overall	50
Number Of Papers	Number Of Authors
One	53
Two	6
More Than Two	11
Type Of Paper	Number
Conference	36
Journal	13
Book Section	1
Type Of Benchmark	Number Of Papers
Open Source	33
None	10
Test	6
Industrial	4
In-House	2
Year	Amount Of Papers
1999	2
2000	1
2001	0
2002	0
2003	1
2004	3
2005	1
2006	2
2007	4
2008	1
2009	0
2010	0
2011	6
2012	8
2013	6
2014	4
2015	6
2016	5
Year	EA	SOA	Other
1999	0	0	0
2000	0	0	0
2001	0	0	0
2002	0	0	0
2003	0	0	1
2004	2	0	2
2005	1	0	0
2006	1	0	1
2007	2	0	4
2008	0	0	1
2009	0	0	0
2010	0	0	0
2011	3	0	1
2012	3	1	3
2013	3	0	1
2014	4	1	0
2015	4	1	1
2016	3	1	3
